# Supplementary material for: Cyclometalated iridium(iii) complex of a 1,2,3-triazole-based ligand for highly selective sensing of pyrophosphate ion
Source: Royal Society of Chemistry journal article supplement (doi:10.1039/d2dt01634f), 2022-01-01
Supplement: d2dt01634f1.pdf [file d2dt01634f1.pdf]

## Electronic Supplementary Information (ESI)

*For*

# Cyclometalated Iridium(III) Complex of a 1,2,3-Triazole-based Ligand for Highly Selective Sensing of Pyrophosphate Ion

Monosh Rabha,<sup>a</sup> Bhaskar Sen,<sup>a</sup> Sanjoy Kumar Sheet,<sup>a</sup> Kripamoy Aguan,<sup>b</sup> and Snehadrinarayan Khatua<sup>\*a</sup>

<sup>a</sup>*Centre for Advanced Studies, Department of Chemistry, North-Eastern Hill University, Shillong, Meghalaya 793022, India. \*Email: [snehadri@gmail.com](mailto:snehadri@gmail.com); [skhatua@nehu.ac.in](mailto:skhatua@nehu.ac.in).*

<sup>b</sup>*Department of Biotechnology and Bioinformatics, North-Eastern Hill University, Shillong, Meghalaya 793022, India.*

## Table of Contents

| Contents                                                                                                                               | Page no |
|----------------------------------------------------------------------------------------------------------------------------------------|---------|
| 1. List of compounds                                                                                                                   | S2      |
| 2. NMR spectra of Ligand <b>L</b>                                                                                                      | S3      |
| 3. ESI-HRMS spectrum of Ligand <b>L</b>                                                                                                | S4      |
| 4. NMR spectra of complex <b>1</b> [PF <sub>6</sub> ]                                                                                  | S4–S6   |
| 5. ESI-HRMS spectra of complex <b>1</b> [PF <sub>6</sub> ]                                                                             | S7      |
| 6. Normalized absorbance and PL spectra of complex <b>1</b> [PF <sub>6</sub> ]                                                         | S7      |
| 7. UV-vis selectivity of complex <b>1</b> [PF <sub>6</sub> ] with various anions                                                       | S8      |
| 8. PL selectivity of complex <b>1</b> [PF <sub>6</sub> ] with various biorelevant species                                              | S8      |
| 9. PL spectra of <b>1</b> [PF <sub>6</sub> ] and with H <sub>2</sub> P <sub>2</sub> O <sub>7</sub> <sup>2-</sup> in different solvents | S9      |
| 10. X-ray Crystallography                                                                                                              | S10–S12 |
| 11. Comparison of <b>1</b> [PF <sub>6</sub> ] with other chemosensors for PPI detection                                                | S13–S14 |
| 12. Cyclic voltammetry of [Ir(ppy) <sub>3</sub> ]                                                                                      | S15     |
| 13. Computational studies                                                                                                              | S15–S19 |

**Chart S1.** List of Compounds used in this study.

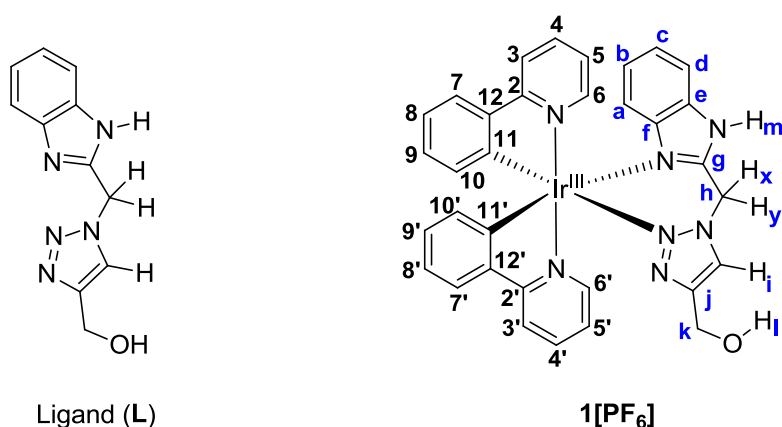

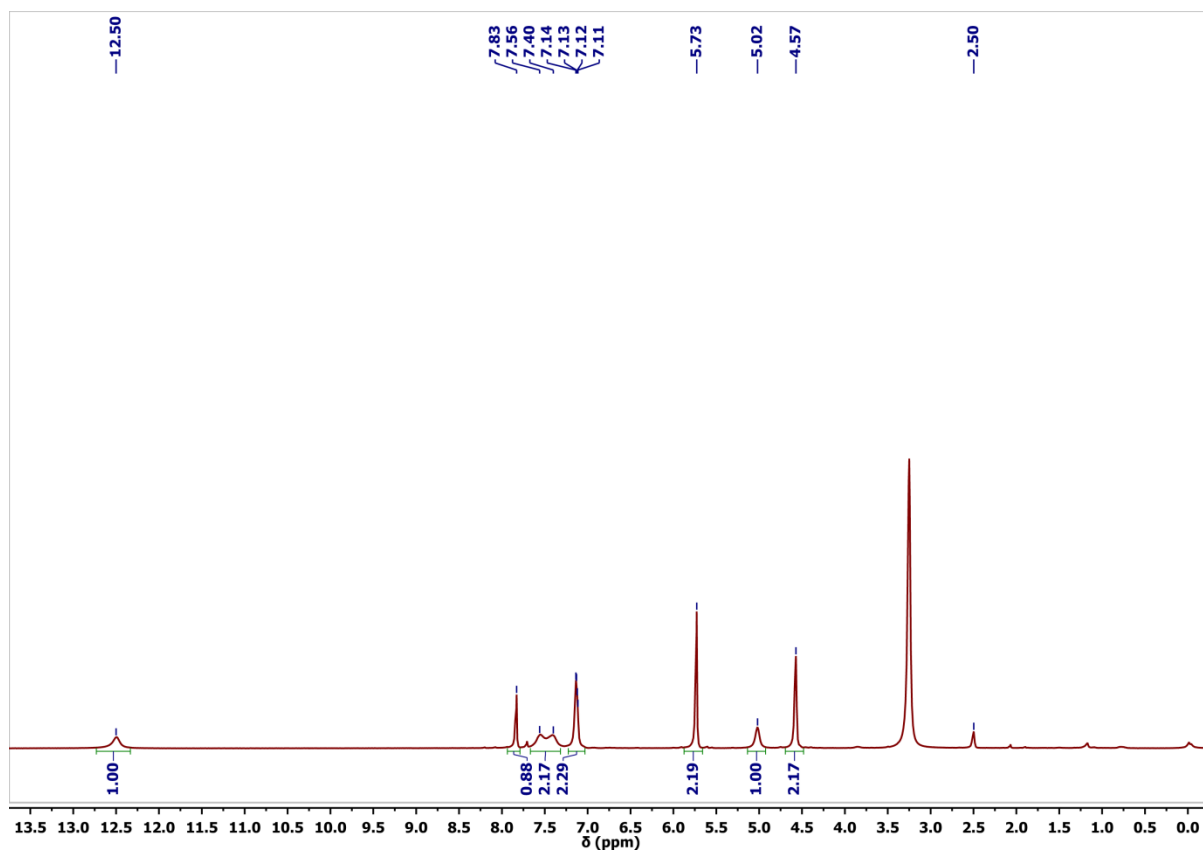

**Figure S1.**  $^1\text{H}$  NMR of ligand **L** in  $\text{DMSO-d}_6$ .

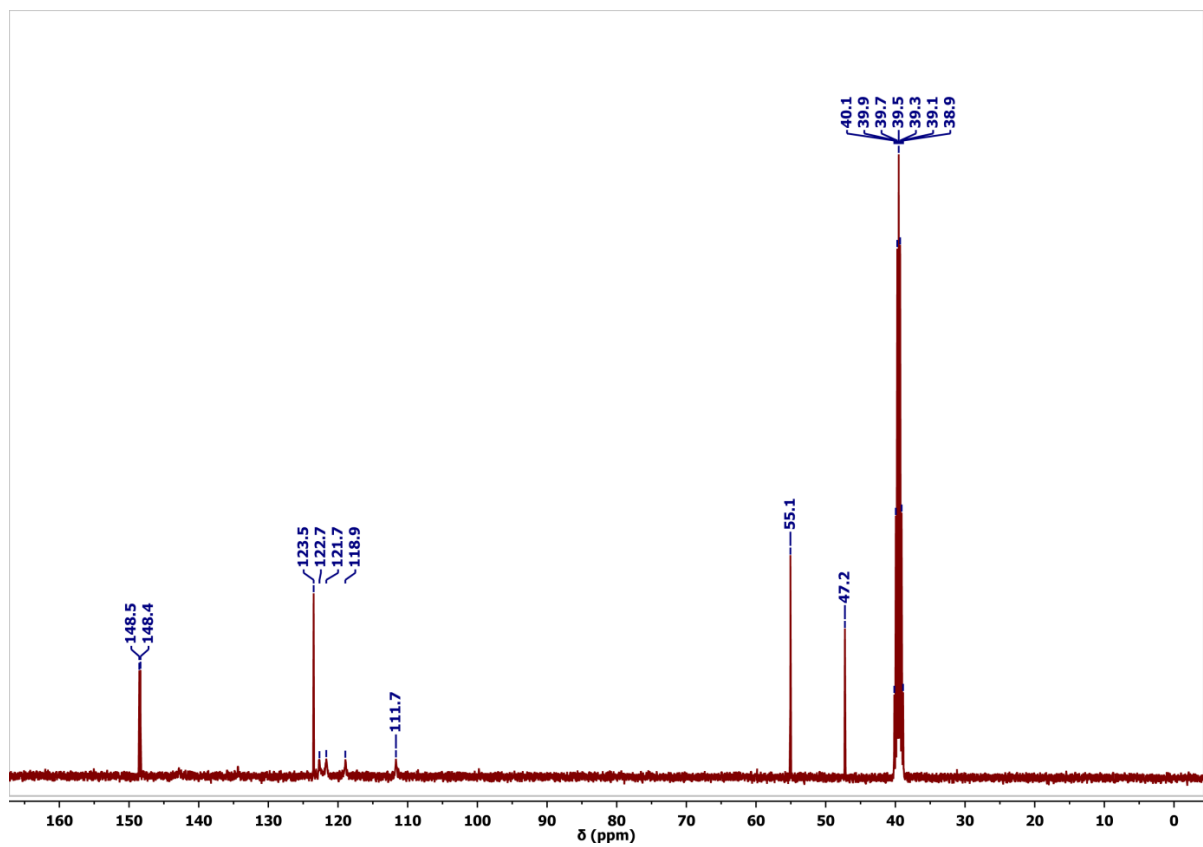

**Figure S2.**  $^{13}\text{C}$  NMR of ligand **L** in  $\text{DMSO-d}_6$ .

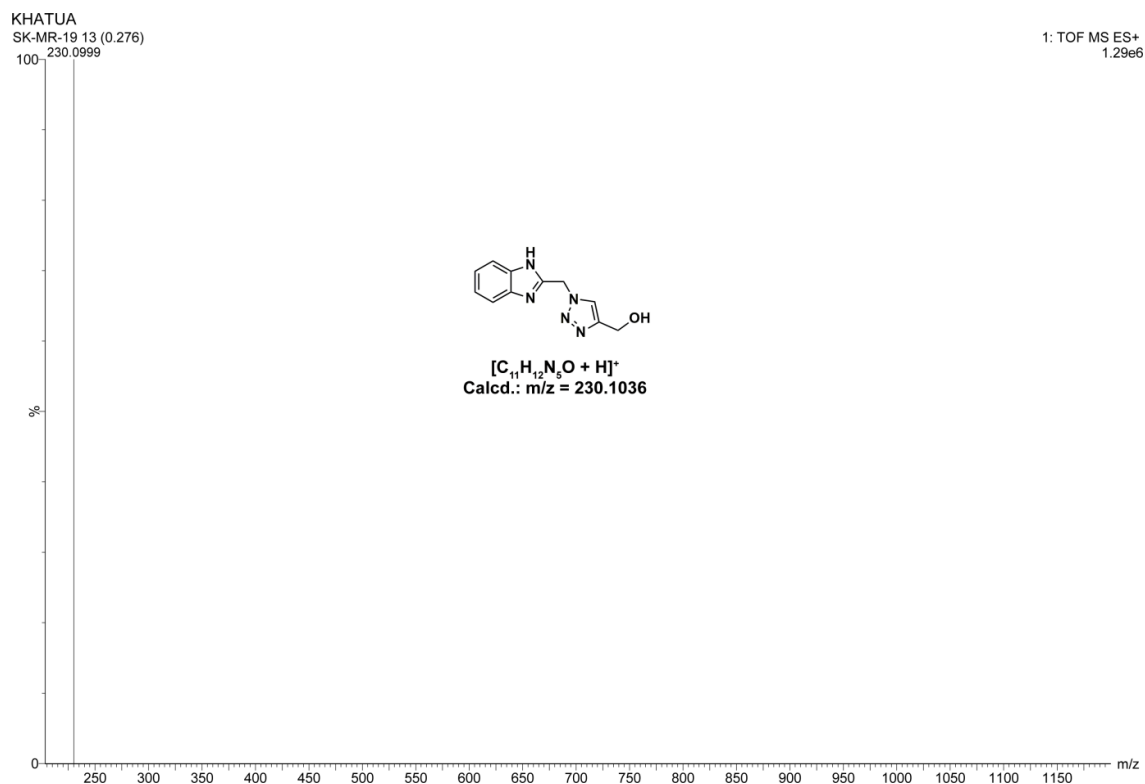

Figure S3. HRMS spectrum of ligand L in methanol.

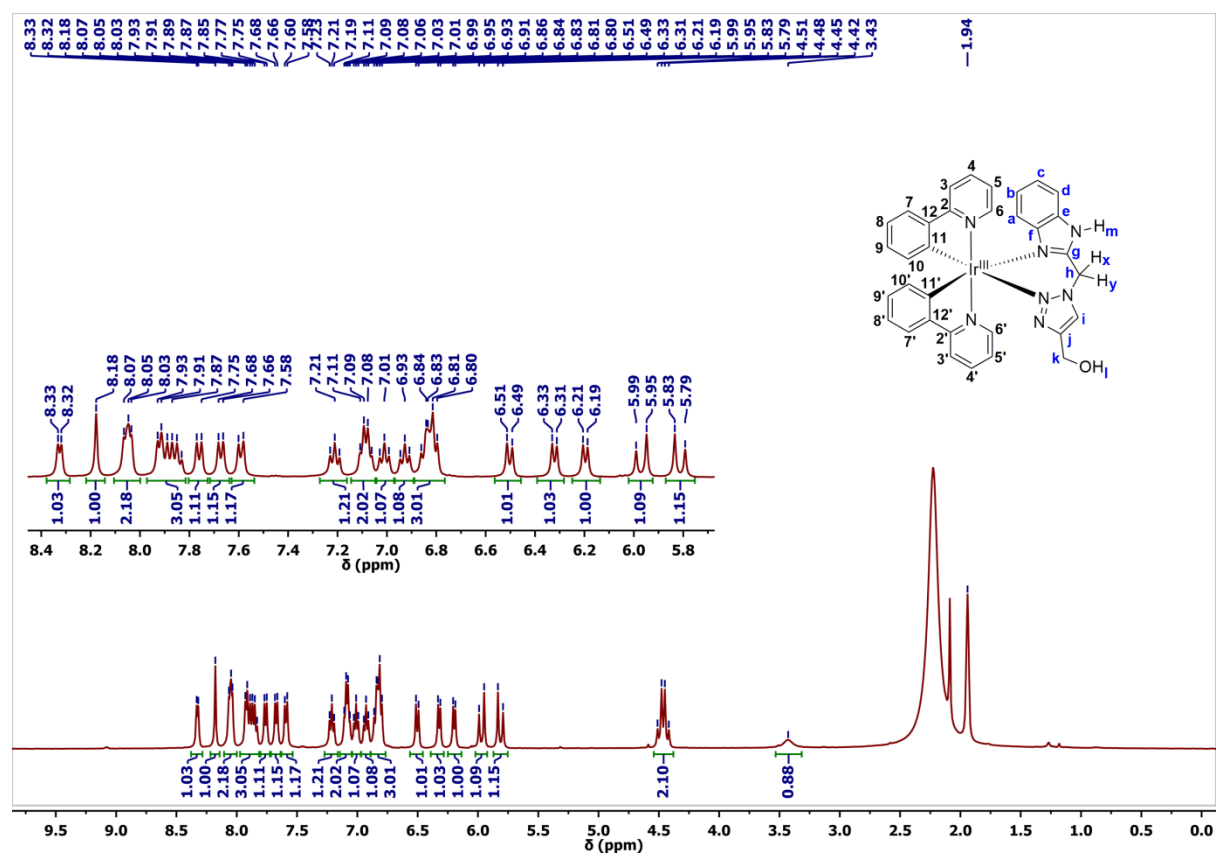

Figure S4. <sup>1</sup>H NMR of complex 1[PF<sub>6</sub>] in CD<sub>3</sub>CN.

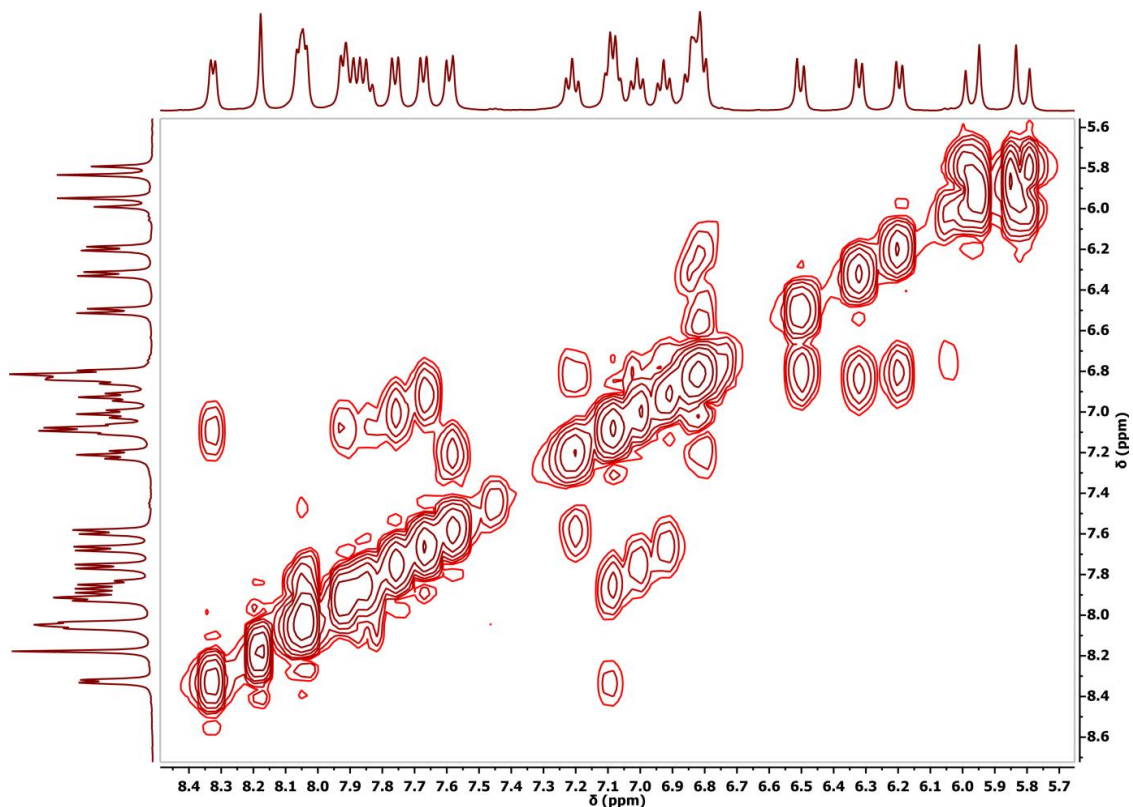

Figure S5.  $^1\text{H}$ - $^1\text{H}$  COSY NMR spectrum of **1**[PF<sub>6</sub>] in CD<sub>3</sub>CN.

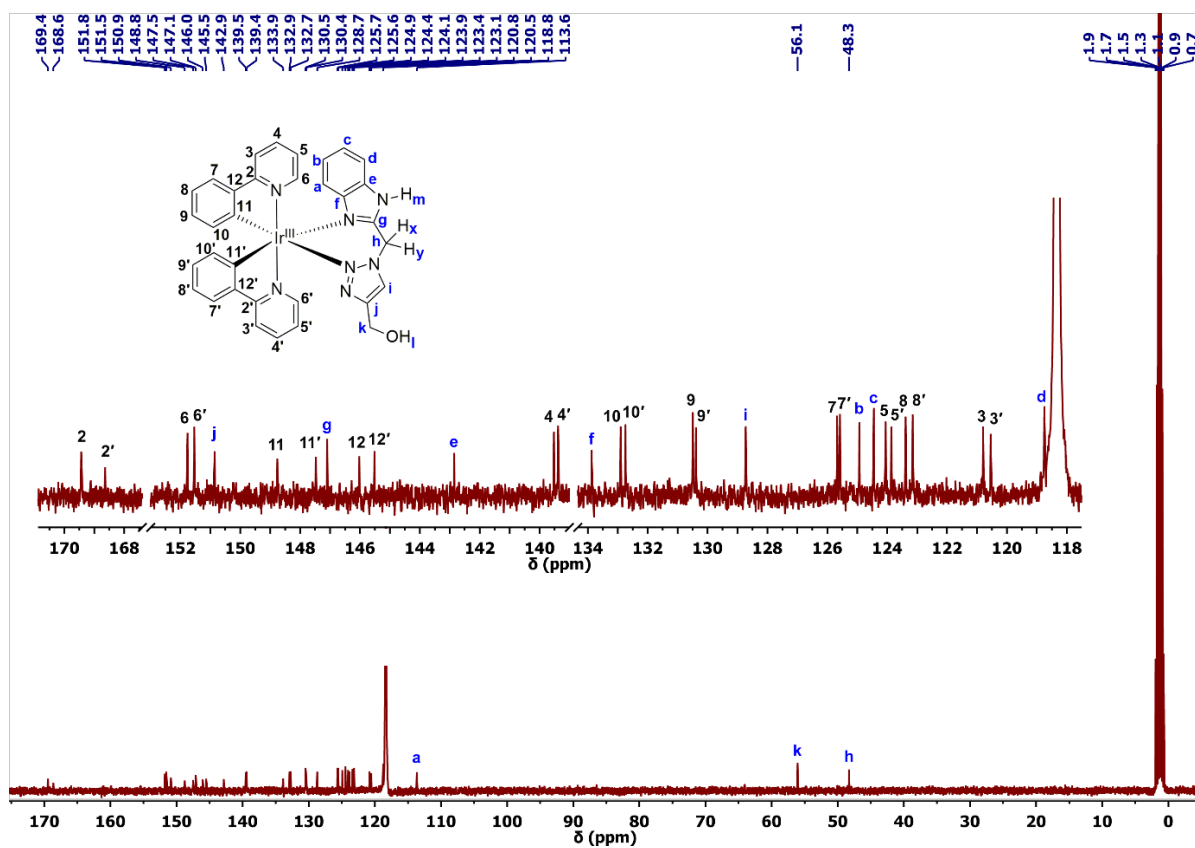

Figure S6.  $^{13}\text{C}$  NMR spectrum of **1**[PF<sub>6</sub>] in CD<sub>3</sub>CN

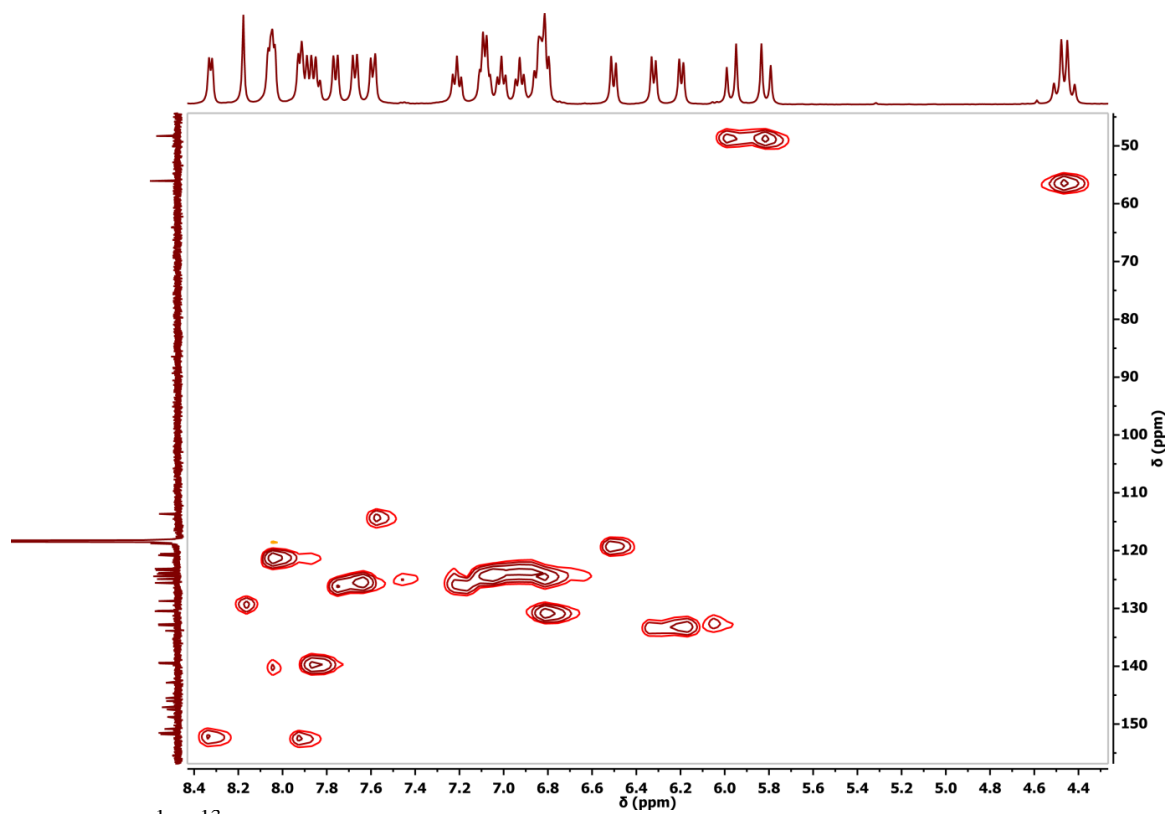

Figure S7.  $^1\text{H}$ - $^{13}\text{C}$  HSQC NMR spectrum of **1**[PF<sub>6</sub>] in CD<sub>3</sub>CN.

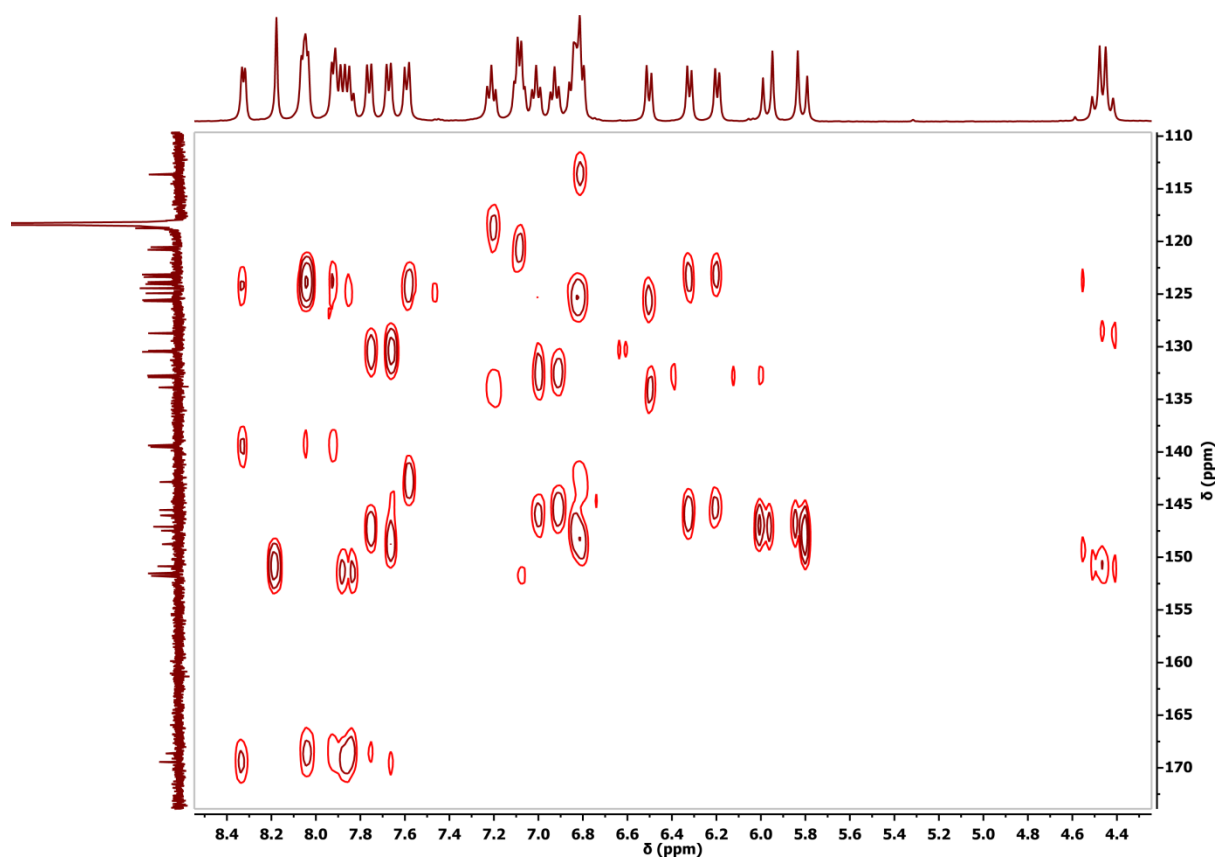

Figure S8.  $^1\text{H}$ - $^{13}\text{C}$  HMBC NMR spectrum of **1**[PF<sub>6</sub>] in CD<sub>3</sub>CN.

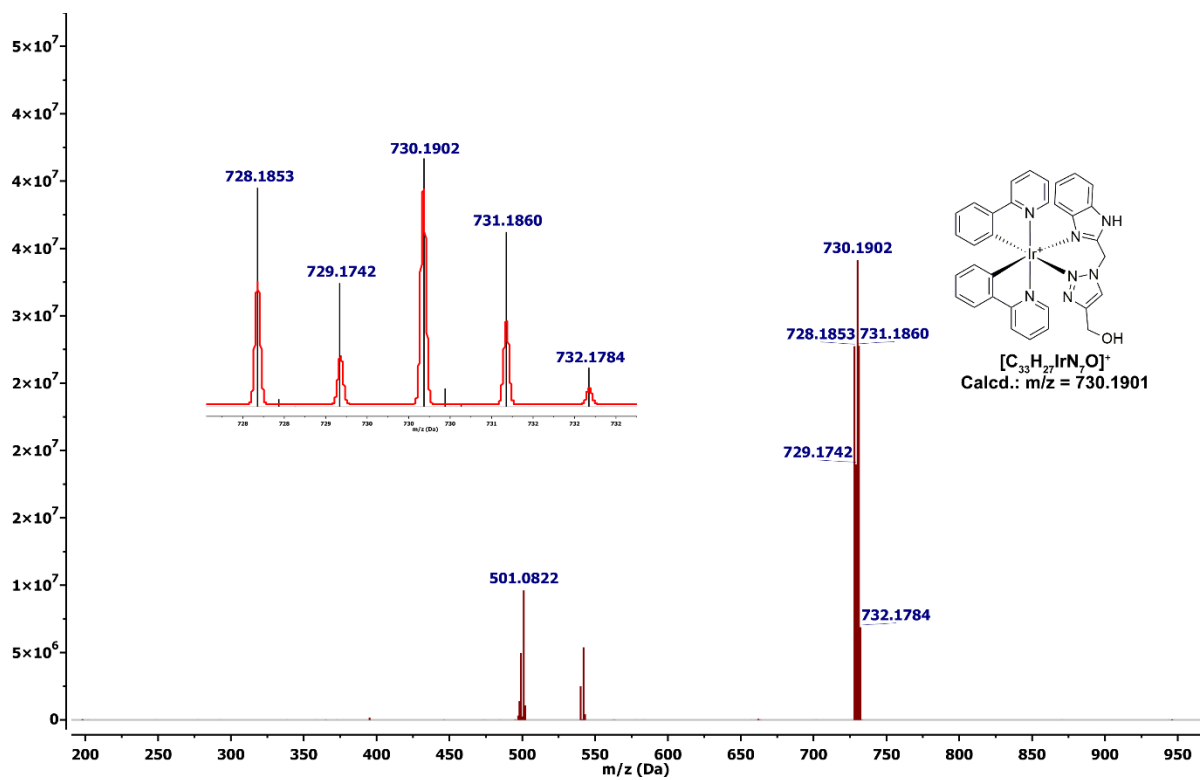

**Figure S9.** HRMS spectrum of **1**[PF<sub>6</sub>] in CH<sub>3</sub>CN.

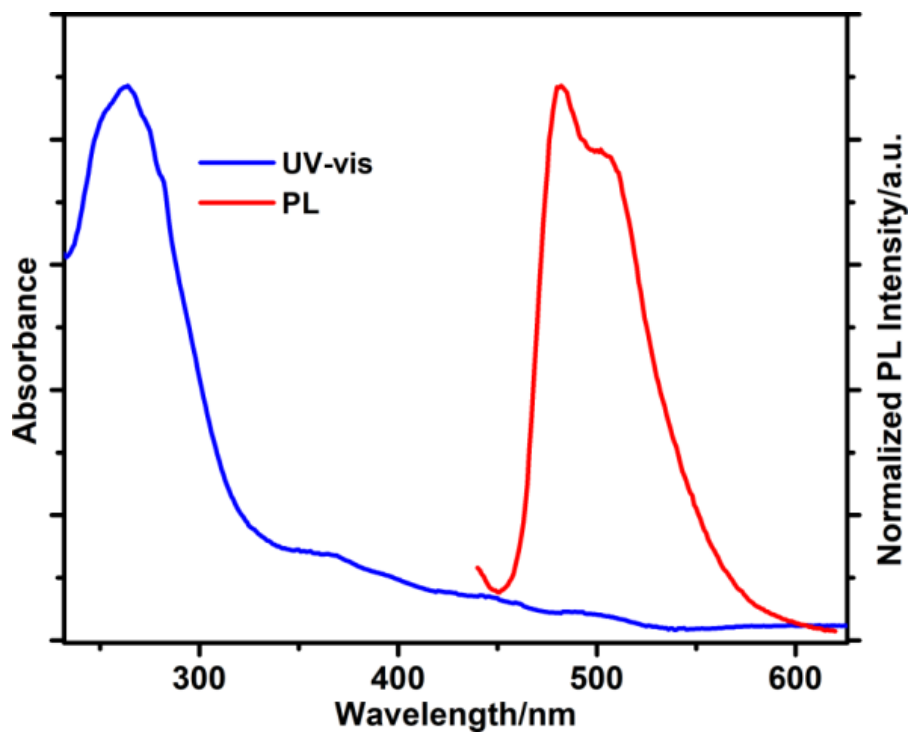

**Figure S10.** Normalized UV-vis and PL spectra of **1**[PF<sub>6</sub>] in CH<sub>3</sub>CN at room temperature.

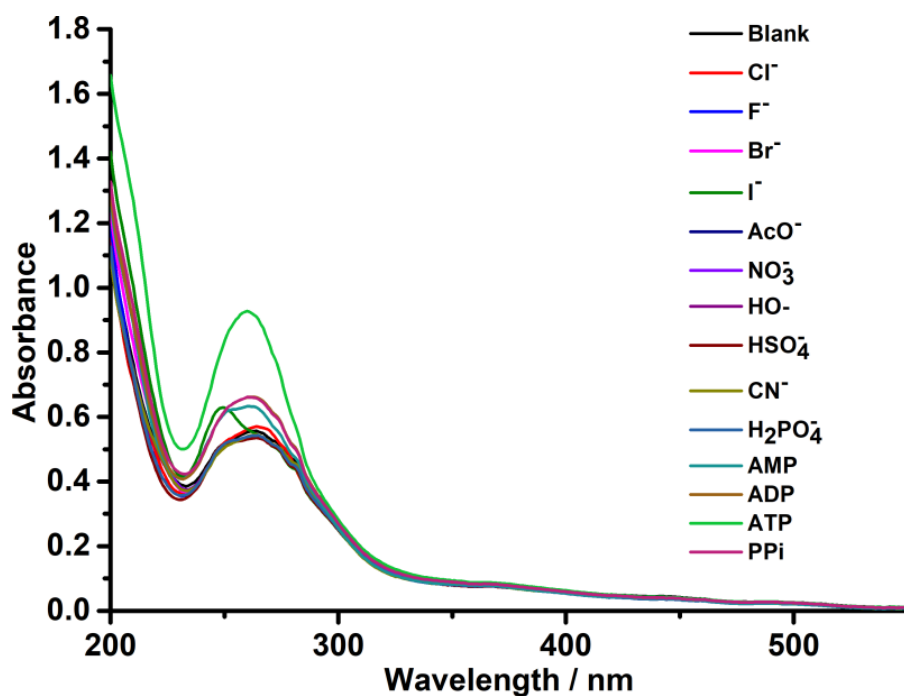

**Figure S11.** UV-vis selectivity of 1[PF<sub>6</sub>] (10 μM) in CH<sub>3</sub>CN with various anions.

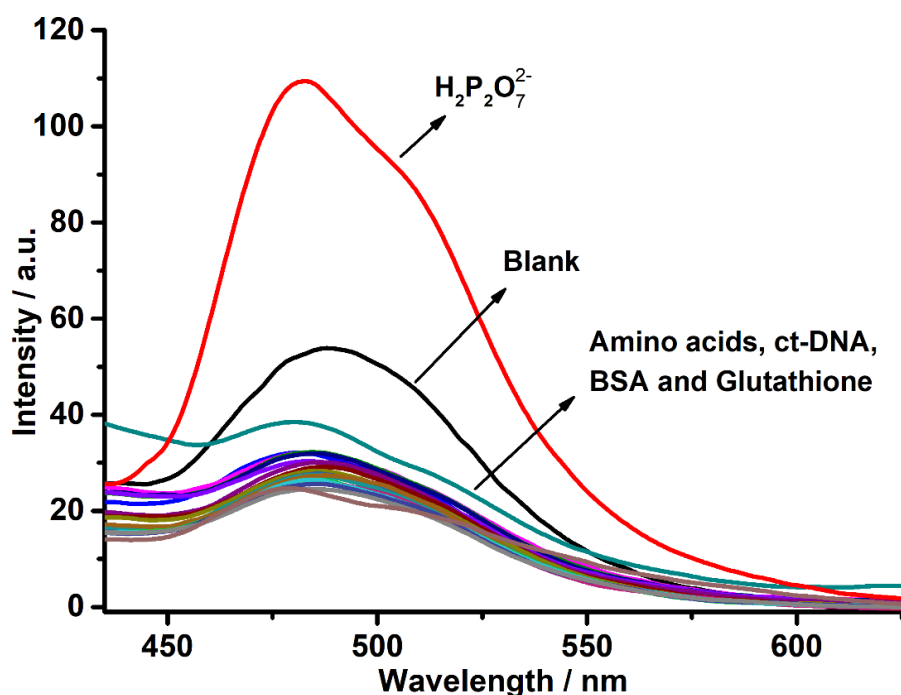

**Figure S12.** PL selectivity of 1[PF<sub>6</sub>] (10 μM) with amino acids (Isoleucine, Tyrosine, Alanine, Leucine, Arginine, Glutamic acid, Glycine, Proline, Serine, Tryptophan, Valine, Histidine, Aspartic acid, Phenylalanine), BSA protein, ct-DNA, Cysteine, Glutathione, and H<sub>2</sub>P<sub>2</sub>O<sub>7</sub><sup>2-</sup> (30 μM) in CH<sub>3</sub>CN containing 1% HEPES buffer (0.01 M, pH 7.4) ( $\lambda_{\text{ex}} = 370$  nm).



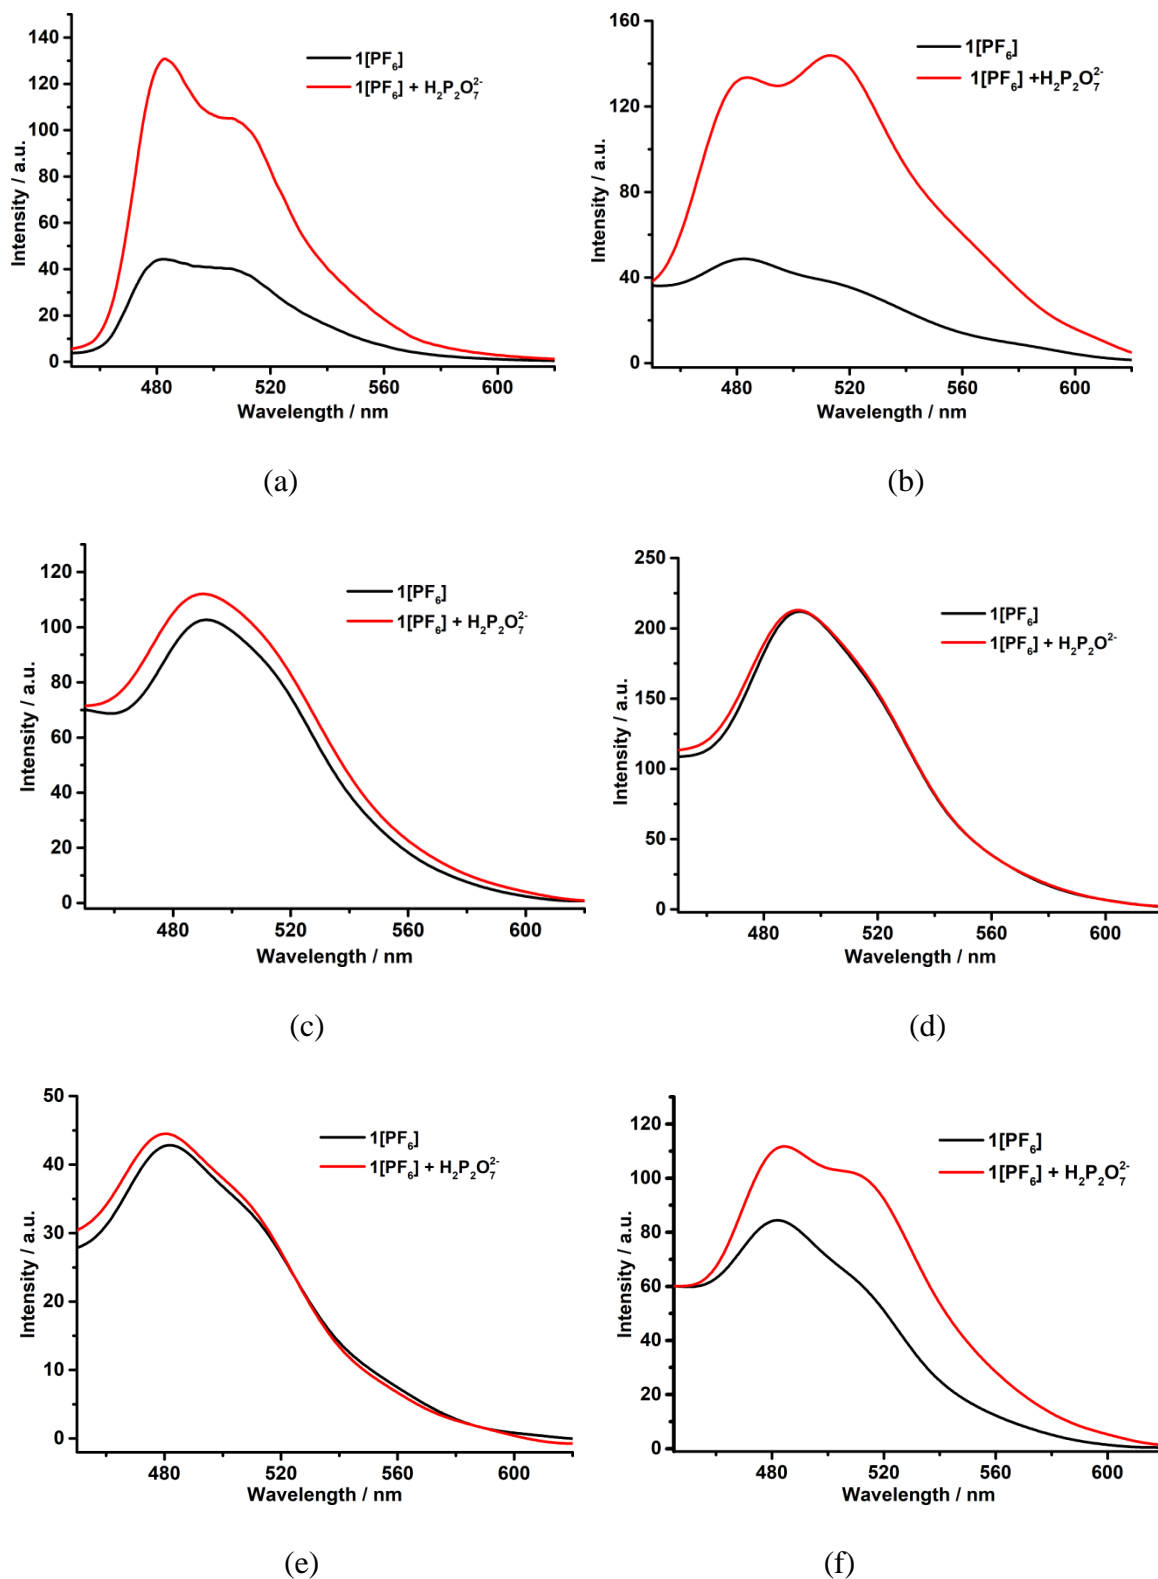

**Figure S13.** PL spectra of  $1[\text{PF}_6]$  ( $10 \mu\text{M}$ ) and in the presence of  $\text{H}_2\text{P}_2\text{O}_7^{2-}$  ( $30 \mu\text{M}$ ) in different solvents: (a)  $\text{CH}_3\text{CN}$ , (b)  $\text{DCM}$ , (c)  $\text{DMF}$ , (d)  $\text{DMSO}$ , (e)  $\text{MeOH}$ , and (f)  $\text{THF}$  ( $\lambda_{\text{ex}} = 370 \text{ nm}$ ).

## X-Ray Crystallography

Single crystals of **1[PF<sub>6</sub>]**, were obtained from a dichloromethane/methanol (1:1; v/v) solvent mixture. The X-ray data of **1[PF<sub>6</sub>]** was collected at 293 K with Agilent Xcalibur (Eos, Gemini) diffractometer using graphite-monochromated Mo K $\alpha$  radiation ( $\lambda = 0.71073 \text{ \AA}$ ). For **1[PF<sub>6</sub>]**, the data was collected, reduced, and cell refinement was done in CrysAlis PRO (Agilent, 2013) software.<sup>1</sup> The absorption was corrected by SCALE3 ABSPACK multi-scan method in CrysAlisPro. The structures of **1[PF<sub>6</sub>]** was solved by direct methods using the program SHELXS-97<sup>2</sup> and refined by full-matrix least-squares calculations ( $F^2$ ) by using the SHELXL-2018/3 software<sup>3</sup> within the WinGX<sup>4</sup> environment. All non-H atoms for **1[PF<sub>6</sub>]**, were refined anisotropically against  $F^2$  for all reflections. All hydrogen atoms except water hydrogen were placed at their calculated positions and refined isotropically. Unfortunately, it was not possible to collect complete good data set for **1[PF<sub>6</sub>]** due to its poor quality. Attempt to refine all the non-H atoms anisotropically failed due to low-quality datasets, so all non-H atoms such as C22 and C33 for **1[PF<sub>6</sub>]** were refined isotropically. There are six A-level alerts in the check cif file which are due to the high ADP N<sub>6</sub> atom, which is N.P.D. or nearly 2D. Several atoms, such as O<sub>1</sub>, C<sub>11</sub>, C<sub>24</sub>, C<sub>25</sub>, and C<sub>27</sub>, had very high ADP. Several trials failed to refine to structure further. Crystal data collection and refinement details, selected bond lengths, and angles for **1[PF<sub>6</sub>]** are given in Table S1 to Table S2 in ESI, respectively. The .cif file was deposited with the Cambridge Crystallographic Data Centre, and the following code was allocated: CCDC-2173561 for **1[PF<sub>6</sub>]**.

**Table S1.** Crystal data and structure refinement for **1[PF<sub>6</sub>]**.

|                                   |                                                                                  |                             |
|-----------------------------------|----------------------------------------------------------------------------------|-----------------------------|
| Empirical formula                 | C <sub>33</sub> H <sub>29</sub> F <sub>6</sub> IrN <sub>7</sub> O <sub>2</sub> P |                             |
| Formula weight                    | 892.80                                                                           |                             |
| Temperature                       | 293(2) K                                                                         |                             |
| Wavelength                        | 0.71073 Å                                                                        |                             |
| Crystal system                    | Monoclinic                                                                       |                             |
| Space group                       | P2 <sub>1</sub> /c                                                               |                             |
| Unit cell dimensions              | $a = 15.508(3) \text{ \AA}$                                                      | $\alpha = 90^\circ$ .       |
|                                   | $b = 13.606(4) \text{ \AA}$                                                      | $\beta = 112.56(2)^\circ$ . |
|                                   | $c = 18.951(3) \text{ \AA}$                                                      | $\gamma = 90^\circ$ .       |
| Volume                            | 3692.4(16) Å <sup>3</sup>                                                        |                             |
| Z                                 | 4                                                                                |                             |
| Density (calculated)              | 1.606 Mg/m <sup>3</sup>                                                          |                             |
| Absorption coefficient            | 3.729 mm <sup>-1</sup>                                                           |                             |
| F(000)                            | 1752                                                                             |                             |
| Crystal size                      | 0.140 x 0.100 x 0.070 mm <sup>3</sup>                                            |                             |
| Theta range for data collection   | 3.267 to 29.093°.                                                                |                             |
| Index ranges                      | -20 ≤ h ≤ 19, -17 ≤ k ≤ 15, -24 ≤ l ≤ 25                                         |                             |
| Reflections collected             | 13635                                                                            |                             |
| Independent reflections           | 8371 [R(int) = 0.1194]                                                           |                             |
| Completeness to theta = 26.000°   | 99.0 %                                                                           |                             |
| Absorption correction             | Semi-empirical from equivalents                                                  |                             |
| Max. and min. transmission        | 0.914 and 0.854                                                                  |                             |
| Refinement method                 | Full-matrix least-squares on F <sup>2</sup>                                      |                             |
| Data / restraints / parameters    | 8371 / 12 / 443                                                                  |                             |
| Goodness-of-fit on F <sup>2</sup> | 1.060                                                                            |                             |
| Final R indices [I > 2σ(I)]       | R1 = 0.1312, wR2 = 0.3105                                                        |                             |
| R indices (all data)              | R1 = 0.2274, wR2 = 0.3778                                                        |                             |

**Table S2.** Selected bond lengths [Å] and angles [°] for **1[PF<sub>6</sub>]**.

| Bond Length [Å]  |           |                   |           |
|------------------|-----------|-------------------|-----------|
| N(7)-Ir(1)       | 1.98(2)   | C(22)-Ir(1)       | 2.007(18) |
| C(33)-Ir(1)      | 2.077(19) | N(1)-Ir(1)        | 2.174(15) |
| N(2)-N(4)        | 1.31(2)   | N(2)-Ir(1)        | 2.217(15) |
| N(6)-Ir(1)       | 2.00(2)   |                   |           |
| Bond Angles [°]  |           |                   |           |
| N(7)-Ir(1)-N(6)  | 175.0(7)  | N(7)-Ir(1)-C(22)  | 95.8(6)   |
| N(6)-Ir(1)-C(22) | 81.9(6)   | N(7)-Ir(1)-C(33)  | 82.1(8)   |
| N(6)-Ir(1)-C(33) | 93.3(8)   | C(22)-Ir(1)-C(33) | 88.1(7)   |
| N(7)-Ir(1)-N(1)  | 86.7(6)   | N(6)-Ir(1)-N(1)   | 95.8(7)   |
| C(22)-Ir(1)-N(1) | 175.9(6)  | C(33)-Ir(1)-N(1)  | 95.5(7)   |
| N(7)-Ir(1)-N(2)  | 95.4(7)   | N(6)-Ir(1)-N(2)   | 89.1(7)   |
| C(22)-Ir(1)-N(2) | 90.0(6)   | C(33)-Ir(1)-N(2)  | 176.7(7)  |
| N(1)-Ir(1)-N(2)  | 86.5(6)   |                   |           |

**Table S3.** Comparison of **1[PF<sub>6</sub>]** with other chemosensors for luminescent pyrophosphate detection.

| Sl. No. | Probe                                                                                            | LOD of pyrophosphate           | Analytes                                             | Reference                                                   |
|---------|--------------------------------------------------------------------------------------------------|--------------------------------|------------------------------------------------------|-------------------------------------------------------------|
| 1       | 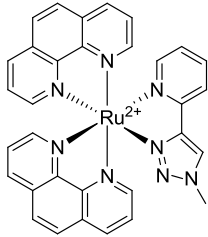                | 0.45 μM                        | PPi<br>& H <sub>2</sub> PO <sub>4</sub> <sup>-</sup> | <i>Inorg. Chem.</i> <b>2014</b> , <i>53</i> , 806–8070.     |
| 2       |                | 2.59 μM                        | PPi<br>& H <sub>2</sub> PO <sub>4</sub> <sup>-</sup> | <i>RSC Adv.</i> <b>2015</b> , <i>5</i> , 46608–46616.       |
| 3       | <br>X = I / H | 0.09 μM (I) and<br>0.25 μM (H) | PPi<br>& H <sub>2</sub> PO <sub>4</sub> <sup>-</sup> | <i>Chem. Eur. J.</i> <b>2016</b> , <i>22</i> , 18051–18059. |
| 4       |               | 0.03 μM                        | PPi<br>& H <sub>2</sub> PO <sub>4</sub> <sup>-</sup> | <i>Inorg. Chem.</i> <b>2017</b> , <i>56</i> , 1249–263.     |
| 5       |               | 0.41 μM                        | PPi<br>& H <sub>2</sub> PO <sub>4</sub> <sup>-</sup> | <i>Inorg. Chem.</i> <b>2019</b> , <i>58</i> , 15993–16003.  |

|   |                                                                                                                    |                                                            |                                                            |                                                                 |
|---|--------------------------------------------------------------------------------------------------------------------|------------------------------------------------------------|------------------------------------------------------------|-----------------------------------------------------------------|
| 6 | 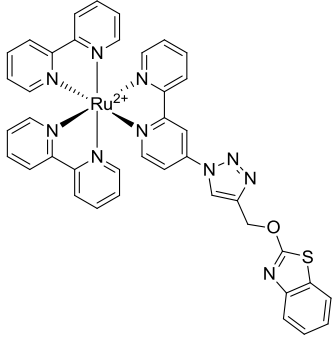                                  | 0.31 $\mu\text{M}$                                         | PPi<br>& $\text{H}_2\text{PO}_4^-$                         | <i>New J. Chem.</i><br><b>2020</b> , <i>44</i> , 6186–<br>6196. |
| 7 |  <p>RtpH (R=H)<br/>RtpI (R=I)</p> | 0.202 $\mu\text{M}$ (RtpH)<br>& 0.177 $\mu\text{M}$ (RtpI) | PPi<br>& $\text{H}_2\text{PO}_4^-$                         | <i>Analyst</i> , <b>2021</b> , <i>146</i> ,<br>1430–1443.       |
| 8 |                                  | 0.43 $\mu\text{M}$                                         | PPi<br>& $\text{H}_2\text{PO}_4^-$                         | <i>Eur. J. Inorg. Chem.</i> <b>2021</b> , 3549–<br>3560.        |
| 9 |                                 | 127 nM                                                     | Pyrophosphate<br>( $\text{H}_2\text{P}_2\text{O}_7^{2-}$ ) | <i>Present Work</i>                                             |

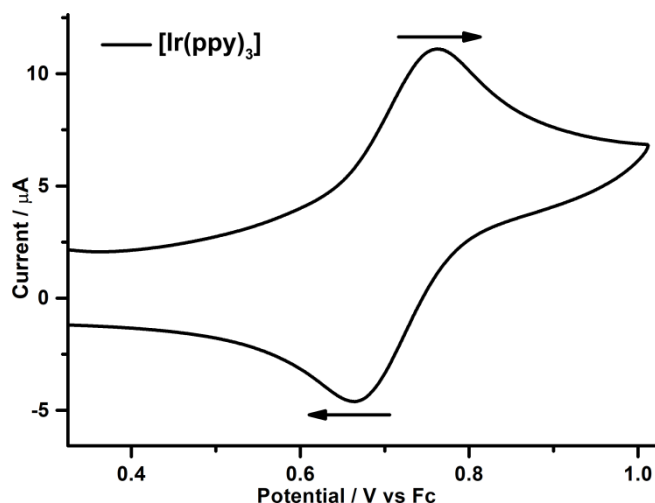

**Figure S14.** Cyclic voltammetric (CV) of 1.0 mM  $[\text{Ir}(\text{ppy})_3]$  in dry and degassed acetonitrile in the presence of 0.1 M tetra-*n*-butylammonium perchlorate ( $\text{Bu}_4\text{NClO}_4$ ) as a supporting electrolyte and potential axis was calibrated with Ferrocene.

### DFT Calculations

The geometry optimization for the free complex **1**, the pyrophosphate adduct,  $\mathbf{1}\cdot\text{H}_2\text{P}_2\text{O}_7^{2-}$  were performed using DFT in the ground state. After the interaction between **1** and  $\text{H}_2\text{P}_2\text{O}_7^{2-}$   $-174.51$  Kcal/mol free energy is released (Figure S15) due to the formation of  $\mathbf{1}\cdot\text{H}_2\text{P}_2\text{O}_7^{2-}$  adduct through long chain H-bonding interaction between compound **1** and oxygen atoms of  $\text{H}_2\text{P}_2\text{O}_7^{2-}$ .

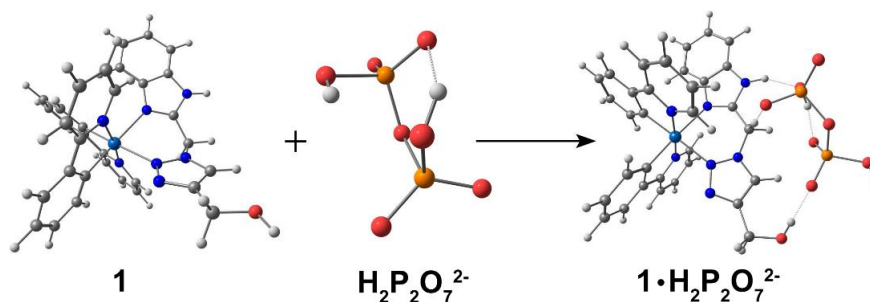

**Figure S15.** The optimized structures of complex **1**,  $\text{H}_2\text{P}_2\text{O}_7^{2-}$ , and  $\mathbf{1}\cdot\text{H}_2\text{P}_2\text{O}_7^{2-}$  in the ground state show the H-bonding interaction between host and guest.

### Calculation of stabilization energy for $\mathbf{1}\cdot\text{H}_2\text{P}_2\text{O}_7^{2-}$ .

$$E_1 = -1152656.08 \text{ kcal/mol}; E_{\text{H}_2\text{P}_2\text{O}_7^{2-}} = -759706.37 \text{ kcal/mol}; E_{\mathbf{1}\cdot\text{H}_2\text{P}_2\text{O}_7^{2-}} = -1912536.96 \text{ kcal/mol}$$

$$\Delta E = E_{\mathbf{1}\cdot\text{H}_2\text{P}_2\text{O}_7^{2-}} - (E_1 + E_{\text{H}_2\text{P}_2\text{O}_7^{2-}})$$

$$= -1912536.96 - \{-1152656.08 + (-759706.37)\} \text{ kcal/mol}$$

$$= -174.51 \text{ kcal/mol.}$$

The singlet state TDDFT calculations on the ground state optimized geometry of **1** and **1**•**H<sub>2</sub>P<sub>2</sub>O<sub>7</sub><sup>2-</sup>** were performed to assign the MLCT and/or LLCT transitions responsible for the corresponding absorption spectra in acetonitrile. The involved molecular orbitals (MOs) with transition energies between the low-lying HOMOs and LUMOs of **1** and **1**•**H<sub>2</sub>P<sub>2</sub>O<sub>7</sub><sup>2-</sup>** obtained from the theoretical calculation are shown in Figure S16, and their associated oscillator strengths are represented in Table S4, where HOMO of both **1** exhibits the  $dx^2-y^2(\text{Ir})$  orbital of metal and  $\pi$  orbitals of ancillary 2-phenylpyridine and analyte target benzimidazole-triazole ligands. On the other hand, the LUMO of **1** is mainly distributed on the  $dz^2(\text{Ir})$  and 2-phenylpyridine parts of ligand **L**. The estimated value for the HOMO – LUMO energy gap from the DFT calculation for complex **1** is calculated to be 3.86 eV, respectively. The TDDFT-based calculated vertical excitation energies, corresponding oscillator strengths ( $f$ ) and compositions of the related transitions assigned to the experimental UV-vis spectrum in CH<sub>3</sub>CN are displayed in Table S4. The TDDFT calculations indicate that the experimentally obtained spin-allowed  $\pi$ – $\pi^*$  transition band at  $\lambda_{\text{max}} = 263$  nm (4.71 eV) of **1** is due to the strong transitions from HOMO  $\rightarrow$  LUMO + 6, HOMO – 4  $\rightarrow$  LUMO + 2 and HOMO – 7  $\rightarrow$  LUMO + 1 ( $f = 0.019$ ) (265 nm, 4.67 eV). The shoulder at longer wavelengths in the region of 355 to 435 nm with  $\lambda_{\text{max}} = 370$  nm was characterized as HOMO  $\rightarrow$  LUMO + 2 ( $f = 0.025$ ) (340 nm, 3.64 eV) and HOMO  $\rightarrow$  LUMO + 1 ( $f = 0.021$ ) (386 nm, 3.21 eV).

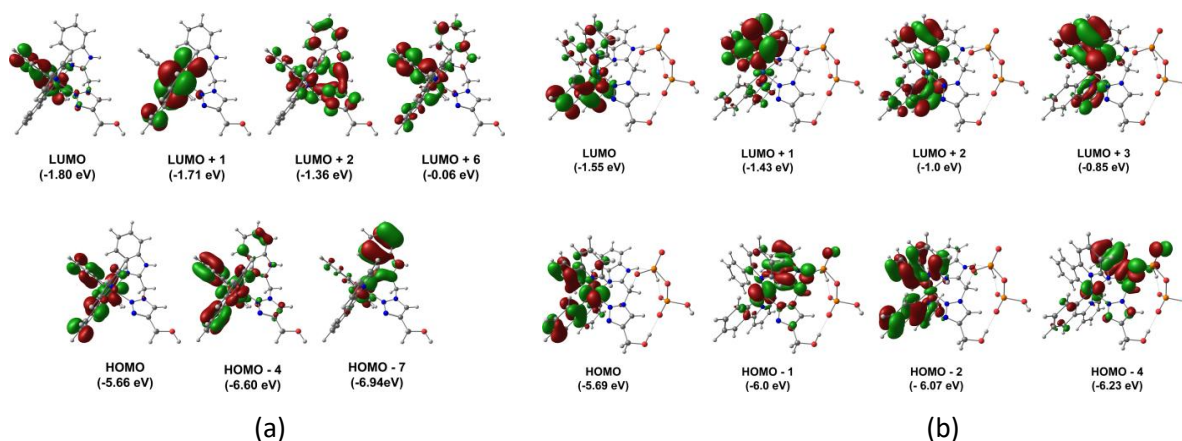

**Figure S16.** Representative plots of molecular orbitals (MOs) of (a) compound **1**, (b) **1**•**H<sub>2</sub>P<sub>2</sub>O<sub>7</sub><sup>2-</sup>** obtained from singlet state TDDFT calculation at the ground state optimized geometry in CH<sub>3</sub>CN [isovalue = 0.03].



**Table S4:** Selected singlet state electronic transitions obtained from TDDFT calculation at B3LYP/6-31G (d) // LANL2DZ level of **1** and **1•H<sub>2</sub>P<sub>2</sub>O<sub>7</sub><sup>2-</sup>** in CH<sub>3</sub>CN.

| Complex                                                       | Experimentally<br>observed<br>transition (nm)<br>/ eV | Computed<br>vertical<br>excitation<br>energy (nm) /<br>eV | Composition         | Oscillator<br>strength<br>(f) | Contri<br>bution<br>(CI) |
|---------------------------------------------------------------|-------------------------------------------------------|-----------------------------------------------------------|---------------------|-------------------------------|--------------------------|
| <b>1</b>                                                      | 263 nm (4.71 eV)                                      | 264 nm (4.68 eV)                                          | HOMO - 7 → LUMO + 1 | 0.115                         | 0.28                     |
|                                                               |                                                       |                                                           | HOMO - 4 → LUMO + 2 |                               | 0.32                     |
|                                                               |                                                       |                                                           | HOMO → LUMO + 6     |                               | 0.28                     |
|                                                               | 370 nm (3.35 eV)                                      | 340 nm (3.64 eV)<br>386 nm (3.21 eV)                      | HOMO → LUMO + 2     | 0.025                         | 0.68                     |
| HOMO → LUMO + 1                                               |                                                       |                                                           | 0.021               | 0.69                          |                          |
| <b>1•H<sub>2</sub>P<sub>2</sub>O<sub>7</sub><sup>2-</sup></b> | 261 nm (4.75 eV)                                      | 263 nm (4.70 eV)<br>268 nm (4.62 eV)                      | HOMO - 4 → LUMO + 2 | 0.126                         | 0.46                     |
|                                                               |                                                       |                                                           | HOMO - 2 → LUMO + 3 | 0.158                         | 0.40                     |
|                                                               | 370 nm (3.35 eV)                                      | 322 nm (3.85 eV)<br>377 nm (3.28 eV)                      | HOMO - 1 → LUMO + 1 | 0.109                         | 0.44                     |
|                                                               |                                                       |                                                           | HOMO - 1 → LUMO     | 0.009                         | 0.60                     |

**Table S5.** The x,y,z Cartesian coordinates of the complex **1**, and **1•H<sub>2</sub>P<sub>2</sub>O<sub>7</sub><sup>2-</sup>** obtained from DFT optimization at B3LYP/6-31G (d) // LANL2DZ level.

| Complex 1 |          |          |          |   |          |          |          |
|-----------|----------|----------|----------|---|----------|----------|----------|
|           | X        | Y        | Z        |   | X        | Y        | Z        |
| C         | -0.58026 | -5.02969 | -0.70568 | N | -2.62449 | 0.63665  | -0.40818 |
| C         | -0.3156  | -4.67675 | 0.59005  | N | -1.83013 | -0.29943 | 0.25941  |
| C         | -0.0578  | -3.19631 | 0.95265  | N | -2.49076 | -1.09966 | 0.95945  |
| C         | -0.10591 | -2.28665 | -0.03978 | C | -3.89779 | -0.93507 | 0.56775  |
| C         | -0.34531 | -2.67461 | -1.47512 | C | -3.95029 | 0.03084  | -0.35299 |
| C         | -0.59619 | -3.95466 | -1.81905 | C | -5.09246 | -1.74191 | 1.10933  |
| C         | 2.91789  | -0.75056 | -1.27602 | O | -6.09704 | -1.84409 | 0.09679  |
| C         | 4.26758  | -0.91399 | -1.23094 | H | -0.775   | -6.05302 | -0.95016 |
| C         | 5.01263  | -0.88099 | 0.12554  | H | -0.28876 | -5.42627 | 1.3532   |
| C         | 4.31984  | -0.68566 | 1.27718  | H | 0.14846  | -2.90291 | 1.96078  |
| C         | 2.79821  | -0.49926 | 1.20404  | H | -0.79709 | -4.22046 | -2.83582 |
| C         | 2.14289  | -0.53046 | 0.03295  | H | 2.40118  | -0.77547 | -2.21267 |
| C         | -0.24653 | -1.46697 | -2.43649 | H | 4.81639  | -1.06634 | -2.13673 |
| C         | 1.89463  | -0.26721 | 2.40112  | H | 6.07414  | -1.01204 | 0.15584  |
| N         | 0.02863  | -0.30896 | -1.87286 | H | 4.82625  | -0.66169 | 2.21943  |
| C         | 0.26016  | 0.90006  | -2.68086 | H | 0.52326  | 1.821    | -2.20383 |
| C         | 0.13376  | 0.84583  | -4.03378 | H | 0.29904  | 1.72345  | -4.62314 |
| C         | -0.25122 | -0.48222 | -4.71678 | H | -0.37259 | -0.53026 | -5.77881 |
| C         | -0.43038 | -1.58617 | -3.95605 | H | -0.69024 | -2.52261 | -4.40377 |
| C         | 2.30877  | -0.21059 | 3.68486  | H | 3.33529  | -0.37218 | 3.93993  |
| C         | 1.26377  | 0.09734  | 4.76853  | H | 1.54688  | 0.15113  | 5.79901  |
| C         | -0.02448 | 0.30206  | 4.394    | H | -0.76866 | 0.53306  | 5.12728  |
| C         | -0.40917 | 0.19745  | 2.90117  | H | -1.42163 | 0.35724  | 2.59418  |
| N         | 0.50076  | -0.08895 | 2.02284  | H | 3.55203  | 5.57771  | -0.73282 |
| Ir        | 0.11025  | -0.2951  | 0.101    | H | 4.4592   | 3.11587  | -0.73562 |
| C         | 2.89071  | 4.76623  | -0.5113  | H | 2.93185  | 1.24812  | -0.31012 |
| C         | 3.42599  | 3.30282  | -0.52954 | H | 1.20545  | 6.01908  | -0.18831 |
| C         | 2.58161  | 2.25893  | -0.28875 | H | -1.30169 | 4.46556  | 0.03443  |
| C         | 1.11487  | 2.58164  | 0.00317  | H | -3.19906 | 2.61982  | -0.08169 |
| C         | 0.67867  | 3.825    | 0.10523  | H | -2.86425 | 1.69364  | 1.36118  |
| C         | 1.58374  | 5.0184   | -0.21009 | H | -4.80095 | 0.30434  | -0.94162 |
| N         | -0.01195 | 1.66973  | 0.17985  | H | -4.76457 | -2.72197 | 1.38662  |
| C         | -1.09494 | 2.40223  | 0.35479  | H | -5.4987  | -1.24603 | 1.96603  |
| N         | -0.72379 | 3.82808  | 0.54401  | H | -6.8418  | -2.34697 | 0.43454  |
| C         | -2.55552 | 1.88474  | 0.35468  |   |          |          |          |

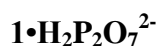

|   | X        | Y        | Z        |    | X        | Y        | Z        |
|---|----------|----------|----------|----|----------|----------|----------|
| C | -1.11117 | -5.54362 | 2.72229  | C  | -0.41217 | -3.81329 | -1.49646 |
| C | 0.19868  | -5.11249 | 2.74618  | Ir | -0.27745 | -1.0926  | 1.15307  |
| C | 0.53763  | -3.72407 | 2.20035  | H  | -0.54921 | 1.65929  | -0.80827 |
| C | -0.46761 | -2.98448 | 1.74451  | H  | 1.32555  | 1.30167  | -1.30625 |
| C | -1.87474 | -3.45653 | 1.676    | H  | 0.17055  | 3.33815  | -0.485   |
| C | -2.2273  | -4.64527 | 2.12922  | O  | -0.02049 | 1.32813  | -4.67681 |
| C | -2.79692 | -2.43078 | 1.06644  | P  | -0.83928 | 2.37995  | -3.66296 |
| N | -2.21565 | -1.31917 | 0.71978  | O  | -2.17429 | 1.60046  | -3.31354 |
| C | -3.00519 | -0.24843 | 0.03844  | O  | -1.28191 | 4.01132  | -3.87789 |
| C | -4.35582 | -0.41623 | -0.17223 | O  | 0.2181   | 2.51868  | -2.44311 |
| C | -5.05189 | -1.70744 | 0.28646  | P  | -1.36955 | 4.12329  | -2.10209 |
| C | -4.30127 | -2.67187 | 0.87533  | O  | -2.21923 | 5.35526  | -1.33207 |
| C | 4.4438   | -0.698   | 1.81208  | O  | -2.00004 | 2.8822   | -1.65403 |
| C | 4.0379   | -1.02052 | 0.55154  | O  | 0.20878  | 4.25924  | -1.48482 |
| C | 2.5181   | -1.16507 | 0.25509  | H  | -0.44487 | 0.317    | -3.57991 |
| N | 1.67841  | -0.99798 | 1.23628  | H  | -1.65546 | 5.39289  | 0.08292  |
| C | 2.113    | -0.65981 | 2.58381  | H  | 0.65652  | 3.28343  | -2.73997 |
| C | 3.38874  | -0.49572 | 2.90833  | H  | -3.14661 | 5.16055  | -1.26585 |
| C | 0.9583   | -0.47449 | 3.57788  | H  | -1.35736 | -6.49753 | 3.111    |
| C | -0.24277 | -0.64292 | 3.06914  | H  | 0.9764   | -5.71751 | 3.13319  |
| C | -1.53521 | -0.44657 | 3.84875  | H  | 1.52567  | -3.33379 | 2.19107  |
| C | -1.43147 | -0.11462 | 5.14922  | H  | -3.24975 | -4.9649  | 2.08828  |
| C | -0.01591 | 0.07591  | 5.78699  | H  | -2.52877 | 0.66106  | -0.28268 |
| C | 1.11168  | -0.08553 | 5.03408  | H  | -4.92535 | 0.35234  | -0.65894 |
| C | -0.15388 | -0.12426 | -1.46082 | H  | -6.10453 | -1.85973 | 0.14953  |
| C | 0.31174  | 1.23243  | -0.96884 | H  | -4.7482  | -3.59136 | 1.20418  |
| N | 0.4555   | 1.43996  | 0.39933  | H  | 5.47848  | -0.59707 | 2.05176  |
| C | -0.15738 | 2.72196  | 0.33604  | H  | 4.75795  | -1.15722 | -0.23459 |
| C | -1.04301 | 2.87524  | 1.29458  | H  | 2.16885  | -1.37302 | -0.7379  |
| N | -1.11607 | 1.54194  | 1.94805  | H  | 3.65634  | -0.23102 | 3.90981  |
| N | -0.37809 | 0.79454  | 1.22722  | H  | -2.48767 | -0.55279 | 3.36947  |
| C | -1.82629 | 4.188    | 1.60049  | H  | -2.31258 | 0.03028  | 5.72545  |
| O | -1.24936 | 5.36146  | 0.9575   | H  | 0.06695  | 0.33084  | 6.81506  |
| N | -0.7211  | -0.34109 | -2.866   | H  | 2.0822   | 0.05323  | 5.45282  |
| C | -0.42046 | -1.77684 | -2.9729  | H  | -1.81576 | 4.28895  | 2.64742  |
| C | -0.342   | -2.2999  | -1.73153 | H  | -2.82753 | 4.13895  | 1.23031  |
| N | -0.21947 | -1.18766 | -0.78036 | H  | -0.15609 | -2.2033  | -5.20194 |
| C | -0.28011 | -2.64368 | -4.21738 | H  | -0.35521 | -4.64606 | -4.886   |
| C | -0.36758 | -4.00259 | -4.03188 | H  | -0.60057 | -5.68856 | -2.4745  |
| C | -0.47787 | -4.61957 | -2.59677 | H  | -0.41164 | -4.22685 | -0.50936 |

## References

1. CrysAlisPro Software System, 1.171.36.28; Agilent Technologies UK Ltd.: Oxford, UK, **2013**.
2. G. M. Sheldrick, A short history of SHELX, *Acta Cryst.* **2008**, *A64*, 112-122.
3. (a) G. M. Sheldrick, SHELXL-97: Program for Crystal Structure Refinement; University of Gottingen: Gottingen, Germany, **1997**. (b) G. M. Sheldrick, SHELXT - Integrated space-group and crystal-structure determination, *Acta Cryst.* **2015**, *C71*, 3–8.
4. (a) L. J. Farrugia, WinGX suite for small-molecule single-crystal crystallography, *J. Appl. Cryst.* **1999**, *32*, 837–838. (b) L. J. Farrugia, WinGX and ORTEP for Windows: an update, *J. Appl. Cryst.* **2012**, *45*, 849–854.
